# Supplementary material for: CXCL13 Correlates with Prognosis, Immune Infiltration, and T Cell Exhaustion in Ovarian Cancer
Source: Research Square preprint supplement (doi:10.21203/rs.3.rs-1026024/v1), 2021-11-09
Supplement: Supplementary file 1 [file fc9bdf0eb8b13369247dd5ba.docx]

**Supplementary material**

**Supplementary Table 1** CXCL13 expression in cancers verus normal tissue in oncomine database.

| **Cancer** | **Cancer type** | **P-value** | **Fold**  **change** | **Rank**  **(%)** | **Sample** | **Reference**  **(PMID)** |
| --- | --- | --- | --- | --- | --- | --- |
| Bladder | Infiltrating Bladder Urothelial Carcinoma | 1.07E-10 | 6.369 | 4% | 157 | 16432078 |
| Breast | Invasive Breast Carcinoma | 8.05E-10 | 3.432 | 1% | 158 | 21373875 |
|  | Medullary Breast Carcinoma | 2.79E-9 | 5.258 | 6% | 2136 | 22522925 |
| Cervica | Cervical Squamous Cell Carcinoma | 9.32E-11 | 19.655 | 1% | 66 | 18506748 |
|  | Cervical Squamous Cell Carcinoma Epithelia | 3.49E-5 | 5.835 | 5% | 41 | 17974957 |
| Head and Neck | Head and Neck Squamous Cell Carcinoma | 3.47E-16 | 67.011 | 1% | 54 | 14729608 |
| Leukemia | Chronic Lymphocytic Leukemia | 4.14E-9 | 3.034 | 1% | 102 | 11733578 |
| Su Lung | Lung Adenocarcinoma | 7.58E-8 | 5.636 | 2% | 66 | 17540040 |
| Stearman Lung | Lung Adenocarcinoma | 6.09E-7 | 7.559 | 3% | 39 | 16314486 |
| Hou Lung | Squamous Cell Lung Carcinoma | 7.35E-15 | 15.388 | 2% | 156 | 20421987 |
|  | Lung Adenocarcinoma | 3.39E-13 | 12.205 | 2% | 156 | 20421987 |
| Landi Lung | Lung Adenocarcinoma | 5.32E-14 | 4.157 | 4% | 107 | 18297132 |
| Okayama Lung | Lung Adenocarcinoma | 1.85E-9 | 14.208 | 9% | 246 | 22080568 |
| Rosenwald Lymphoma | Diffuse Large B-Cell Lymphoma | 1.68E-11 | 8.487 | 1% | 293 | 12075054 |
| Rosenwald Multi-cancer | Rosenwald Multi-cancer | 2.33E-10 | 6.352 | 1% | 102 | 11733578 |
| Alizadeh Lymphoma | Activated B-Cell-Like Diffuse Large B-Cell Lymphoma | 2.75E-9 | 9.452 | 2% | 120 | 10676951 |
|  | Germinal Center B-Cell-Like Diffuse Large B-Cell Lymphoma | 9.65E-7 | 2.843 | 5% | 120 | 10676951 |
| Basso Lymphoma | Diffuse Large B-Cell Lymphoma | 4.36E-9 | 10.064 | 1% | 336 | 15778709 |
|  | Centroblastic Lymphoma | 1.71E-14 | 23.801 | 2% | 336 | 15778709 |
| Compagno Lymphoma | Germinal Center B-Cell-Like Diffuse Large B-Cell Lymphoma | 3.34E-9 | 19.950 | 1% | 136 | 19412164 |
|  | Follicular Lymphoma | 1.28E-14 | 38.045 | 4% | 136 | 19412164 |
|  | Activated B-Cell-Like Diffuse Large B-Cell Lymphoma | 3.41E-9 | 17.551 | 5% | 136 | 19412164 |
|  | Diffuse Large B-Cell Lymphoma | 1.09E-12 | 17.816 | 7% | 136 | 19412164 |
| Brune Lymphoma | Hodgkin's Lymphoma | 5.31E-5 | 5.485 | 6% | 67 | 18794340 |
| Crabtree Uterus | Uterine Corpus Leiomyoma | 1.50E-5 | 5.454 | 4% | 77 | 19622772 |
| Korkola Seminoma | Embryonal Carcinoma, NOS | 8.76E-7 | 11.627 | 8% | 107 | 16424014 |
| Bonome Ovarian | Ovarian Carcinoma | 2.66E-23 | 2.245 | 1% | 195 | 18593951 |
| TCGA Ovarian | Ovarian Serous Cystadenocarcinoma | 2.94E-8 | 2.091 | 2% | 594 |  |


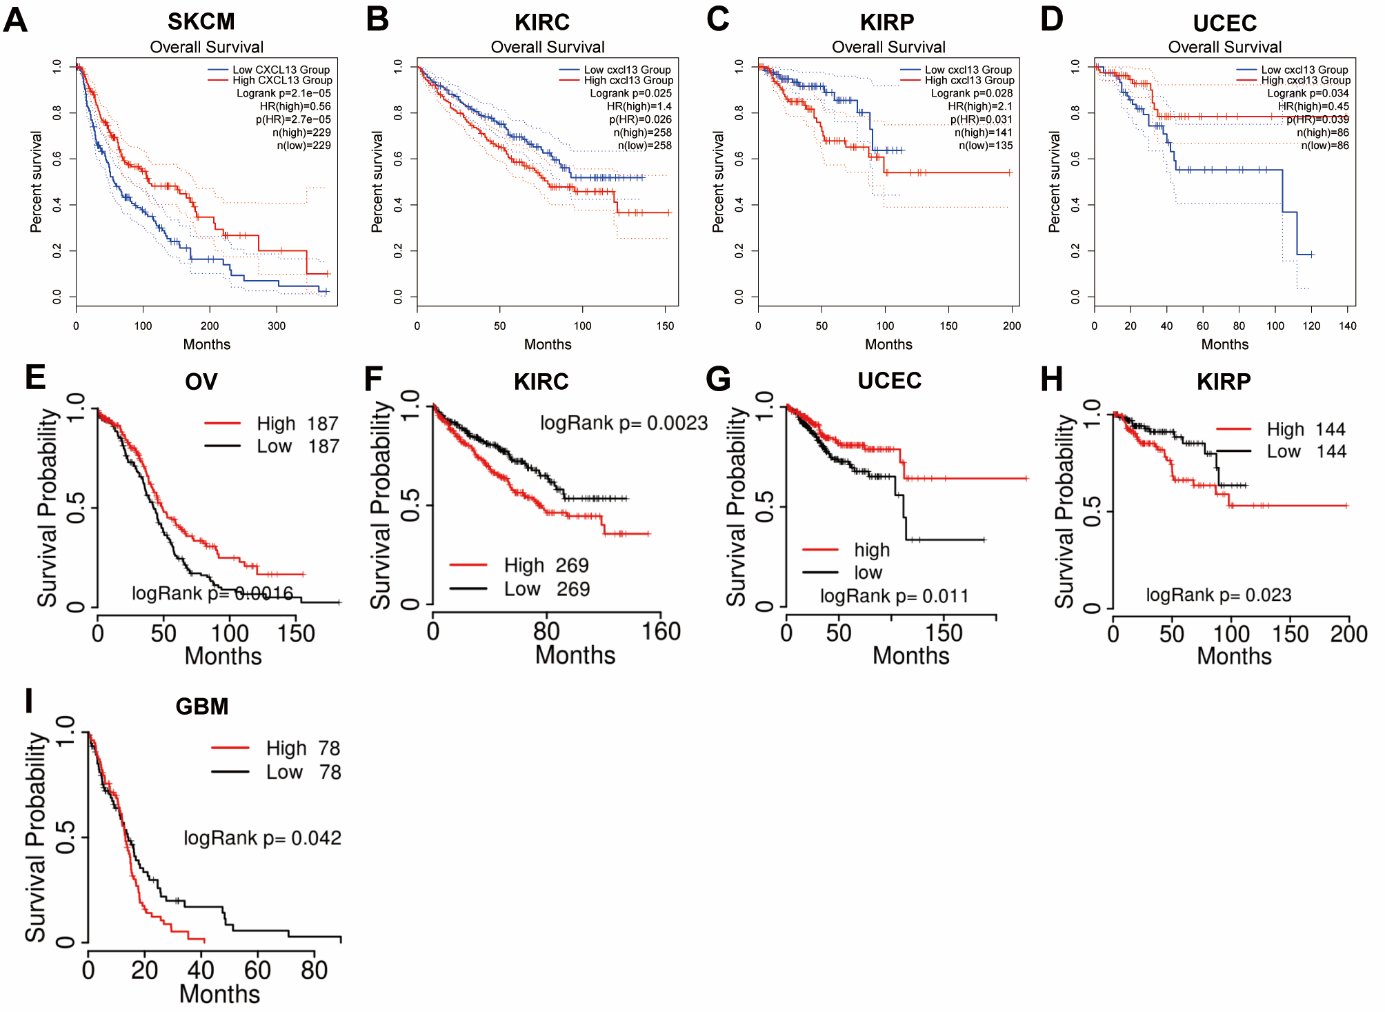


**Supplementary figure 1.** Significance of CXCL13 in predicting the prognosis of diverse cancers assessed through GEPIA2 (A-D) and TCGAportal (E-I).


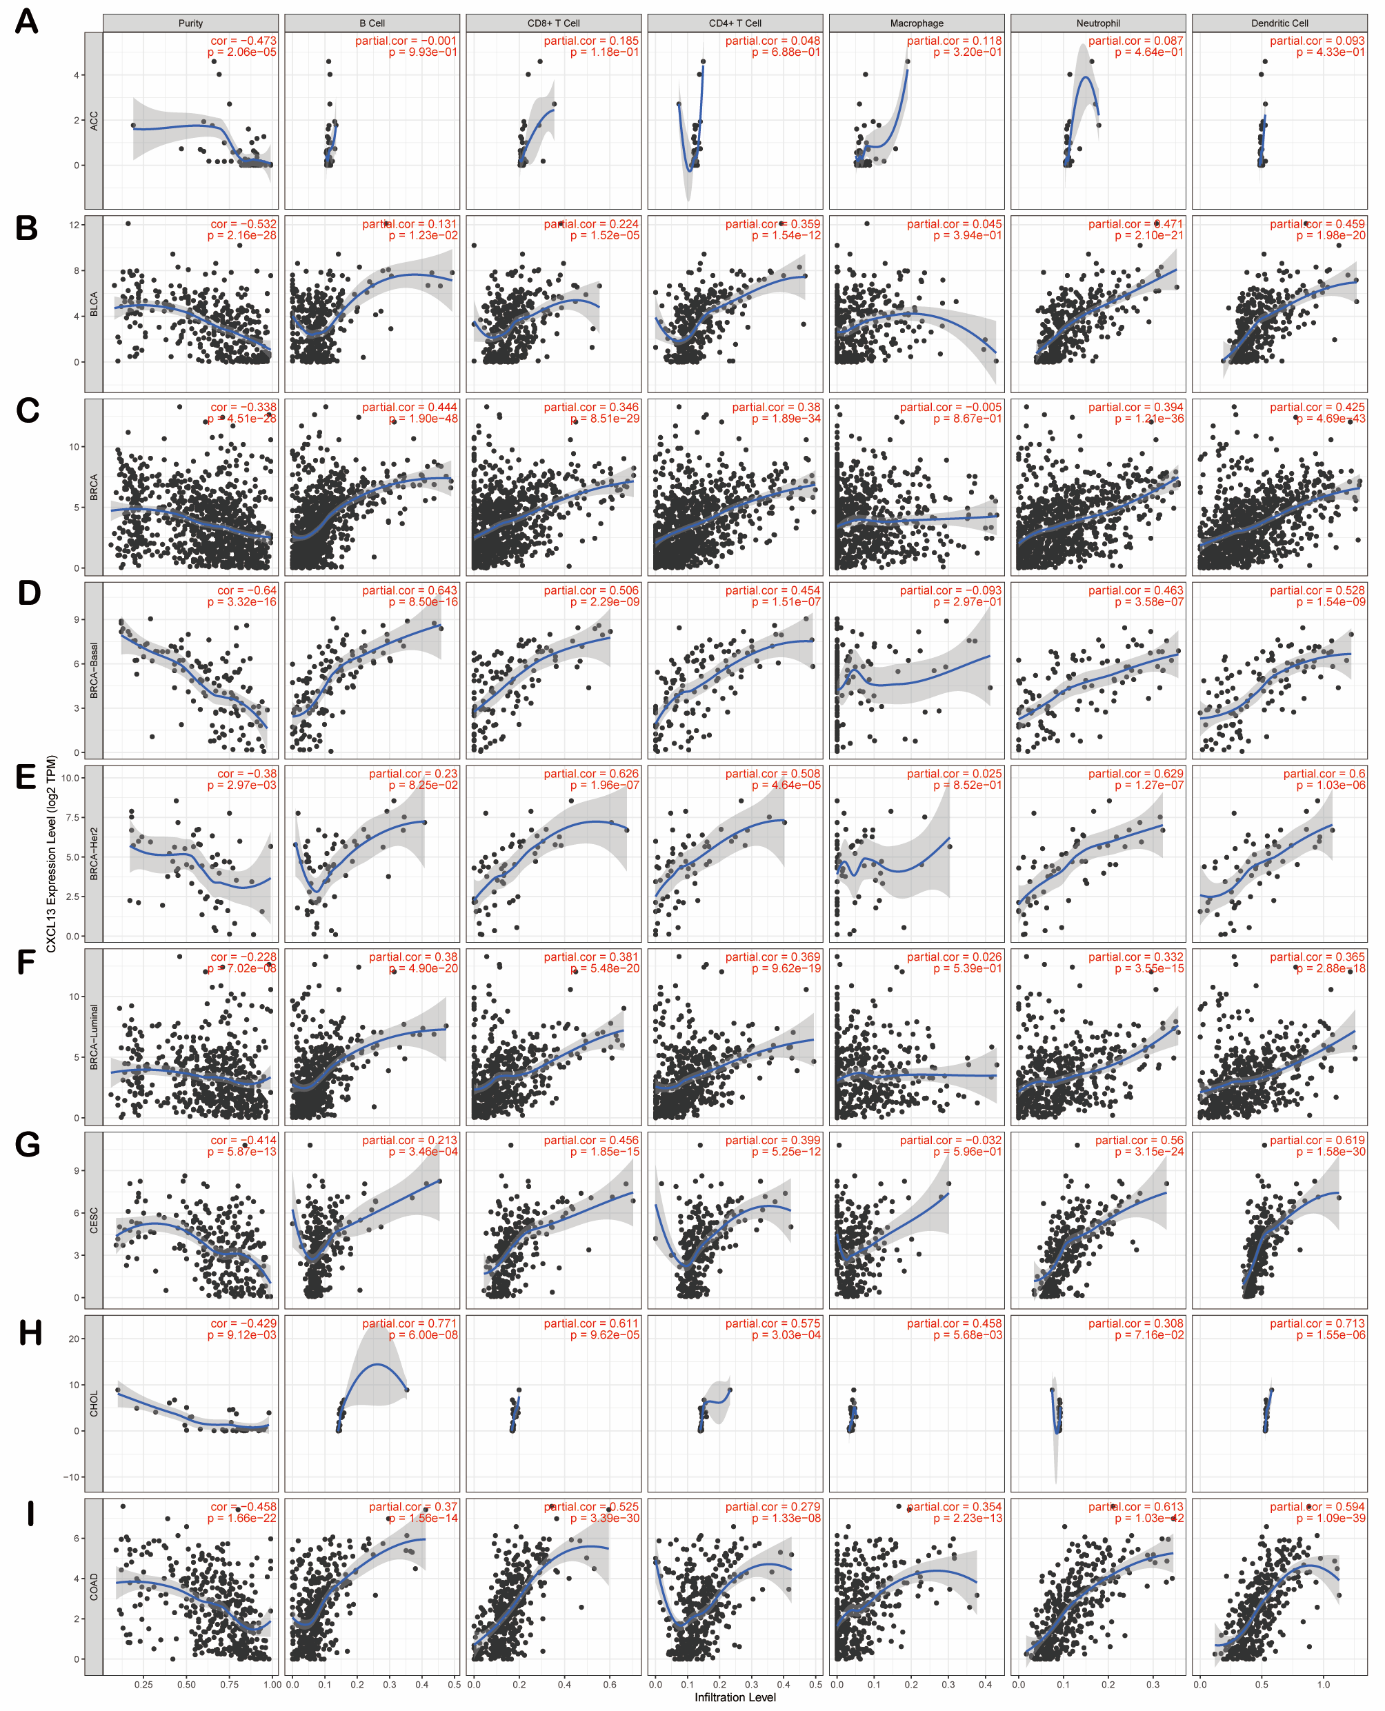


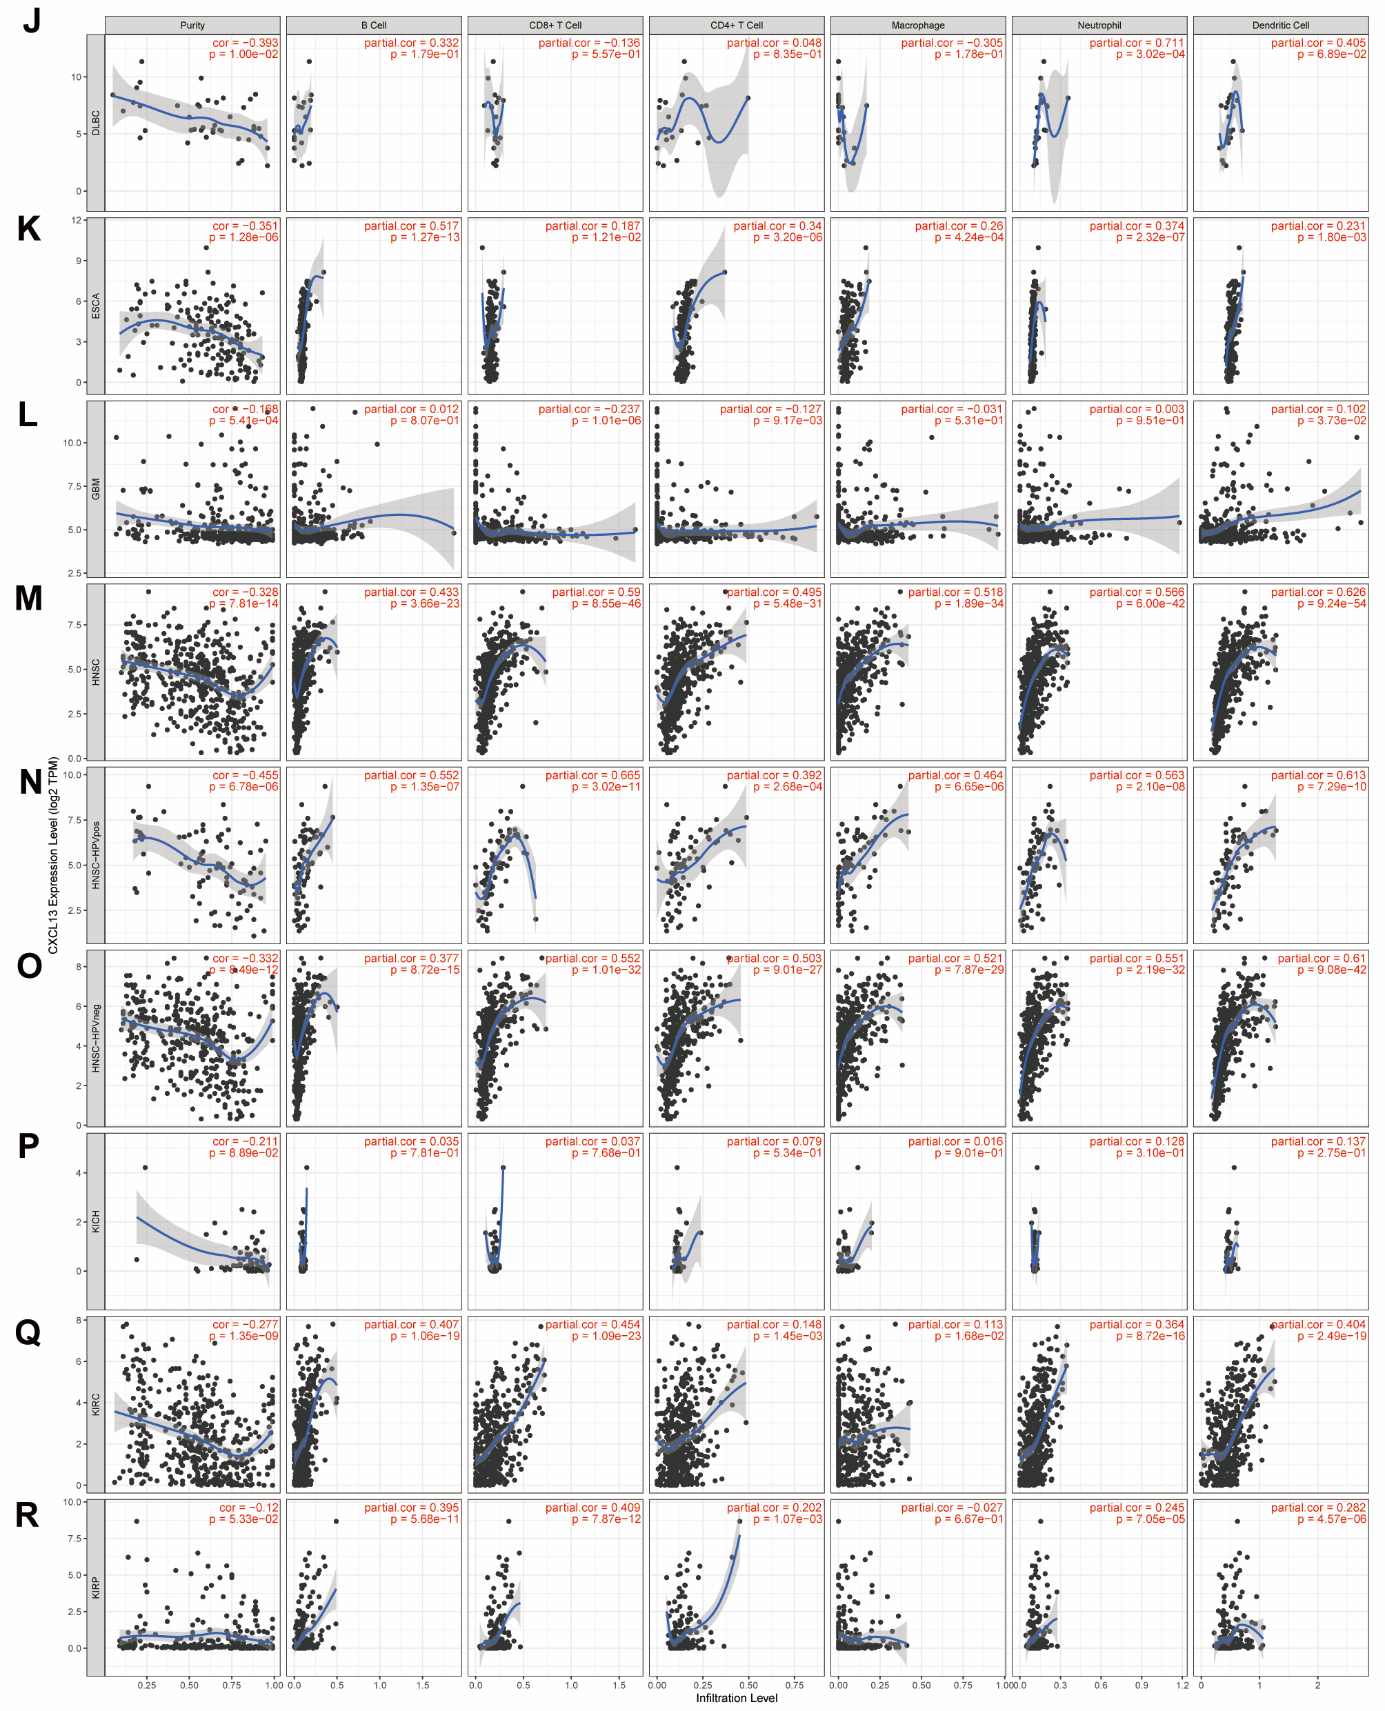


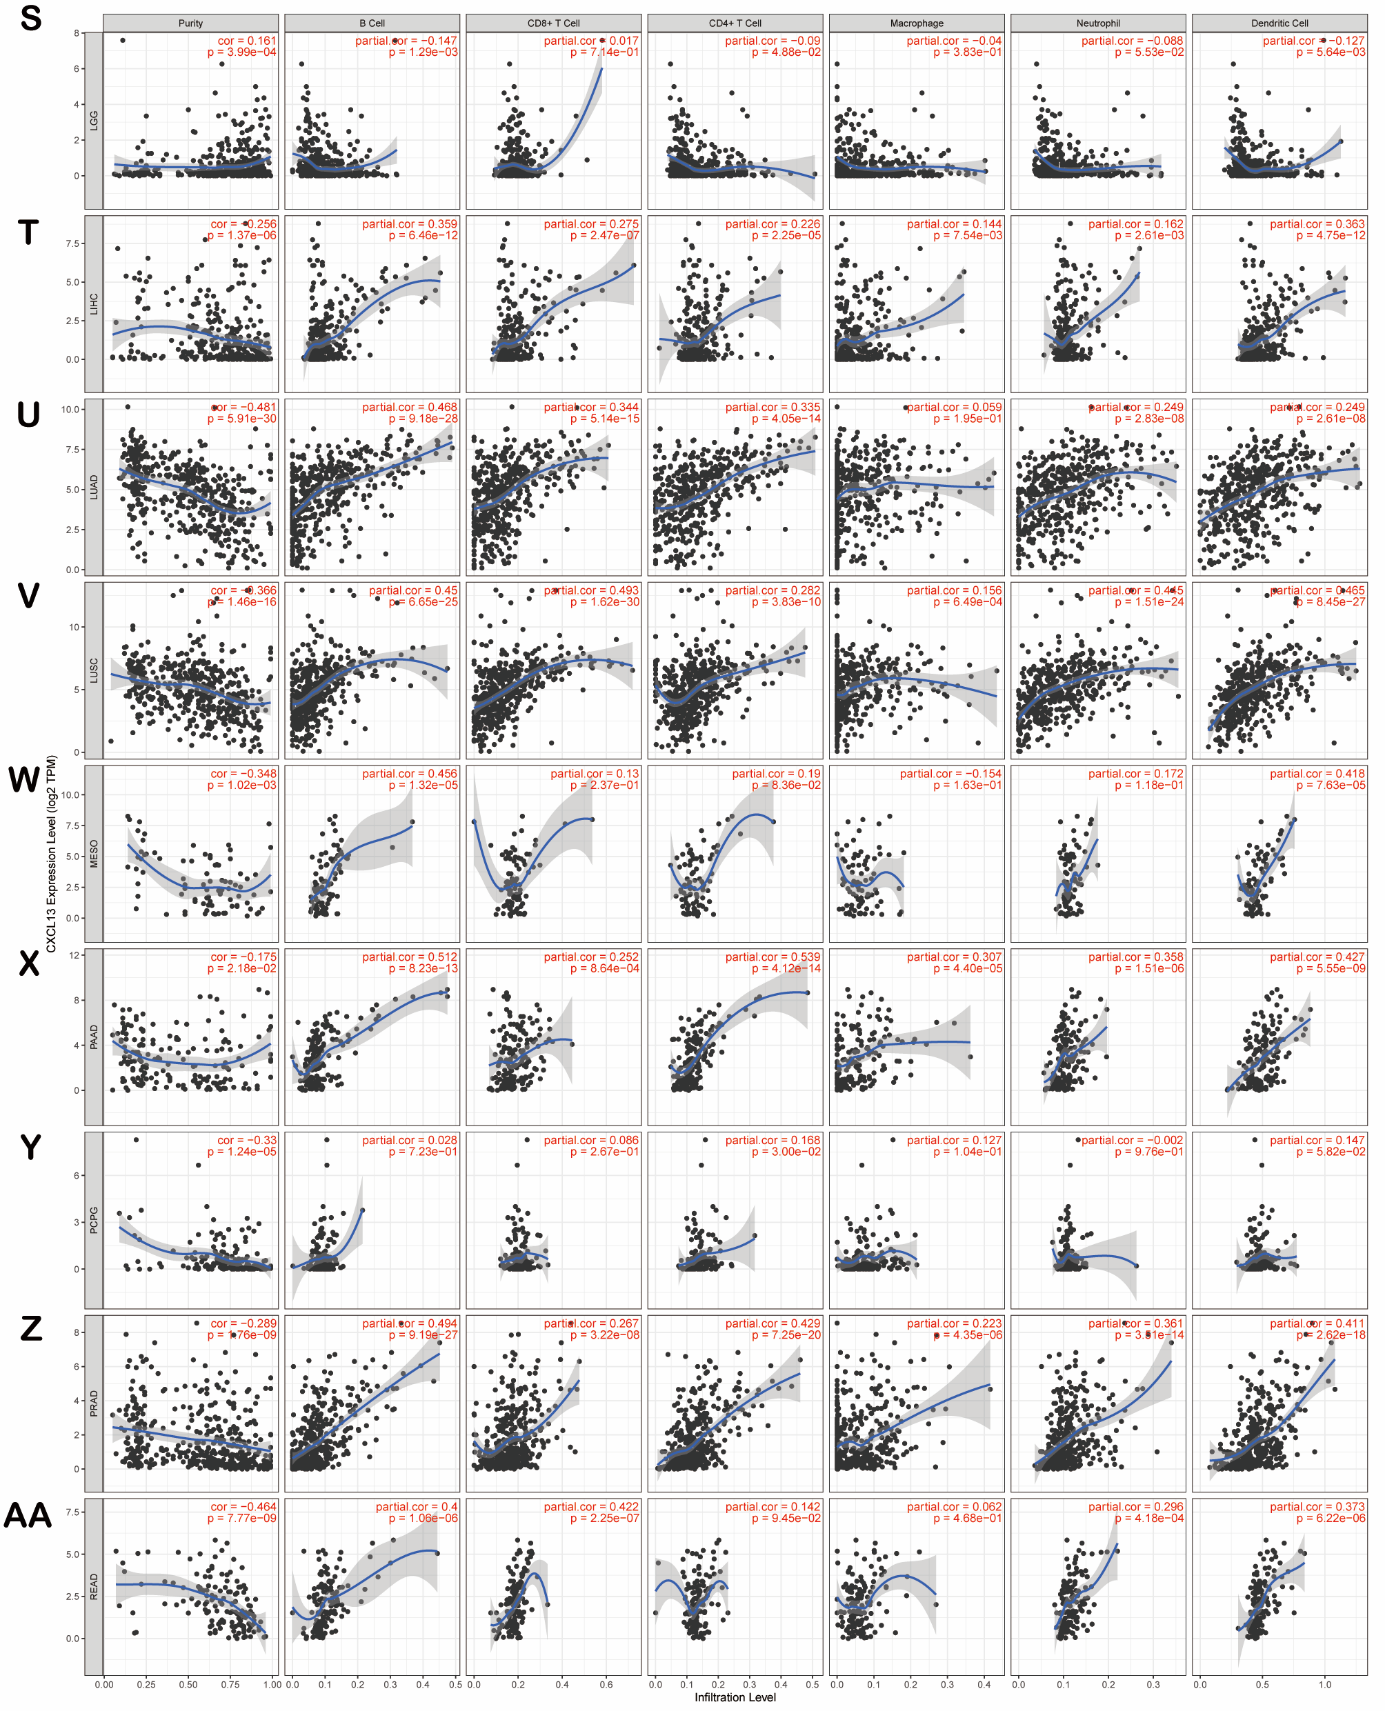


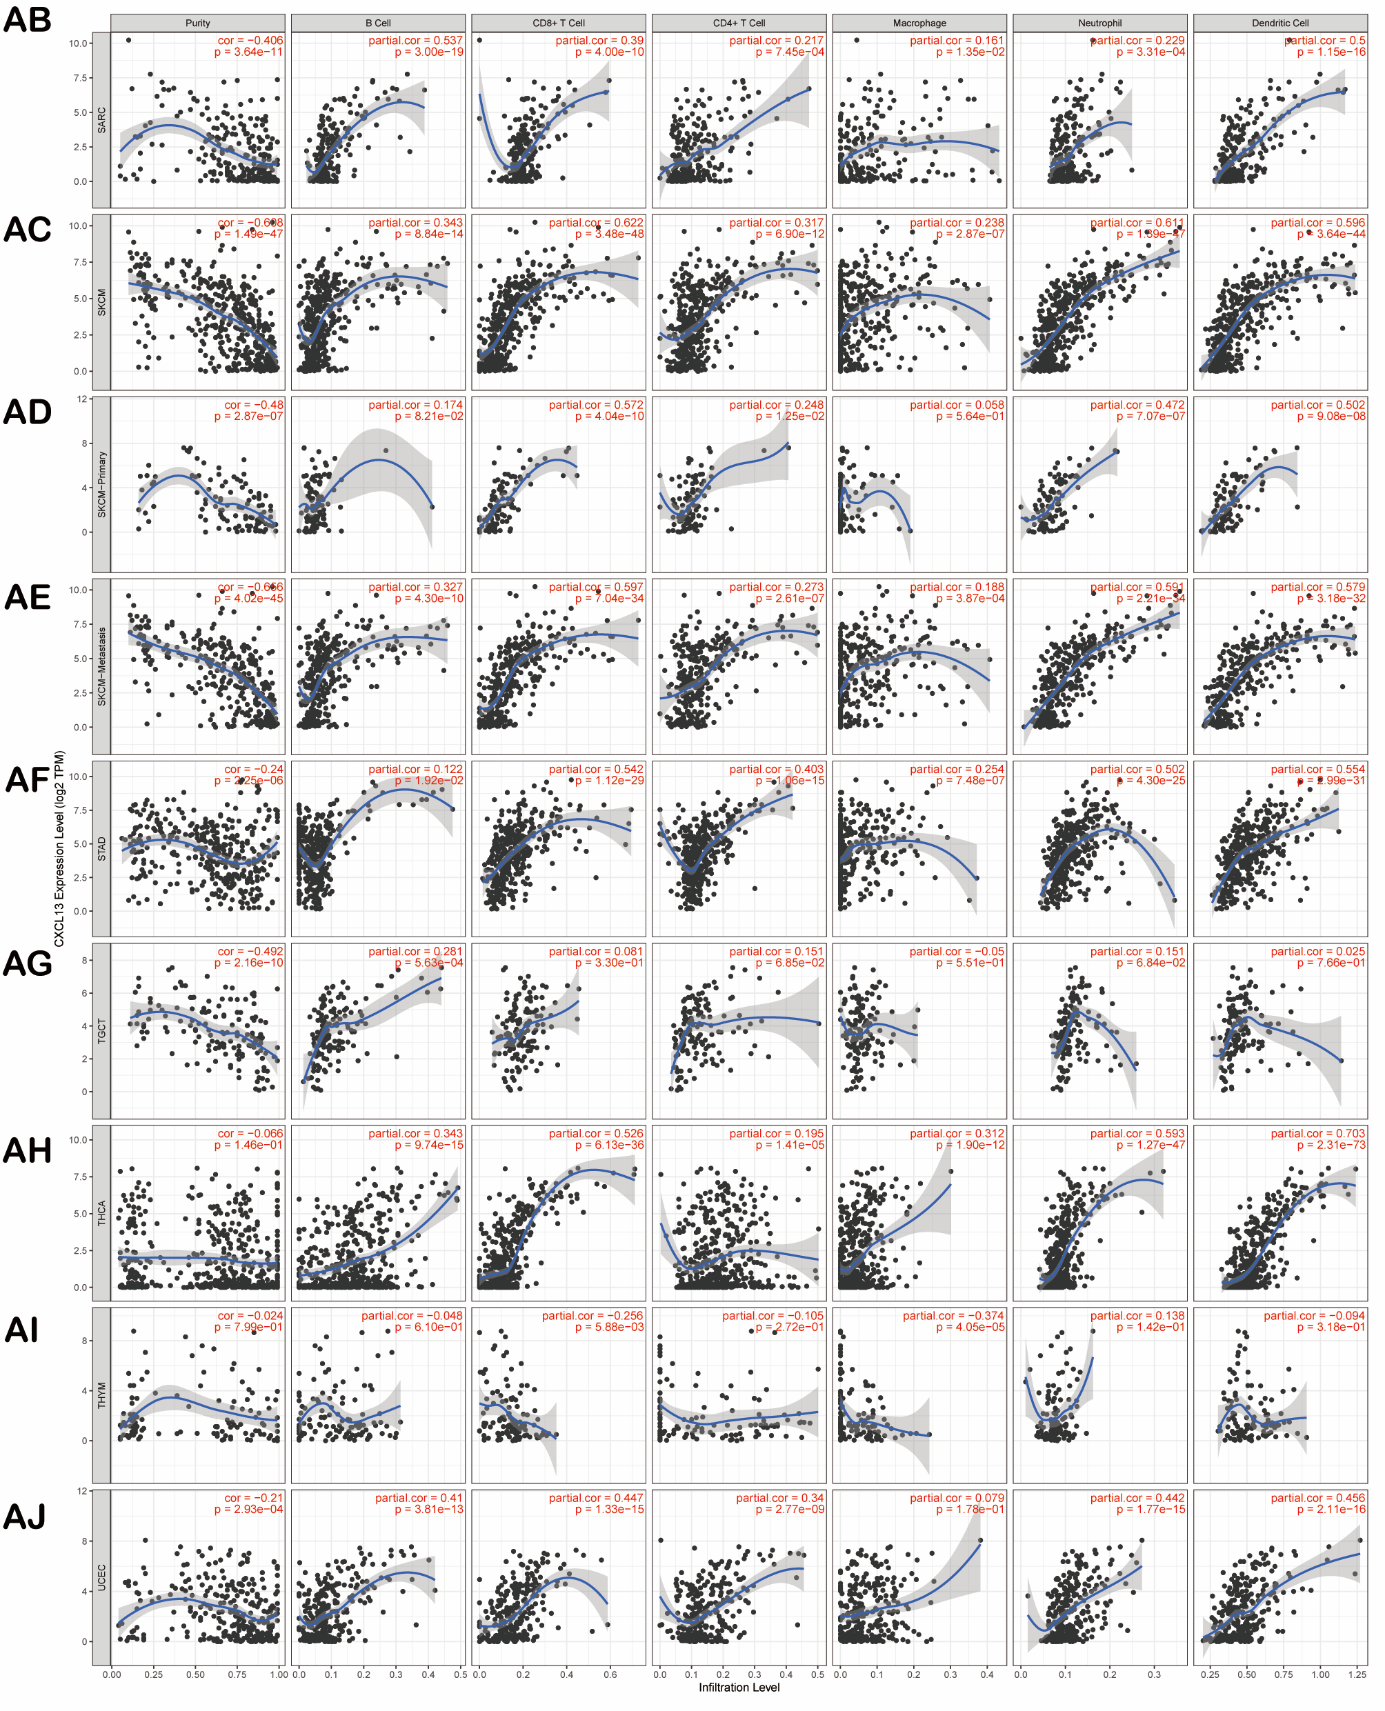


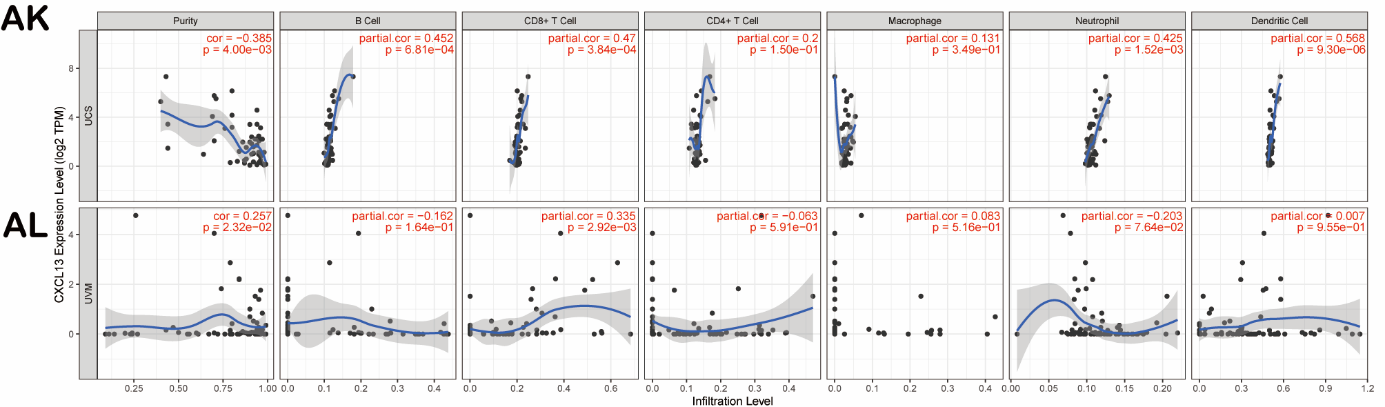


**Supplementary figure 2.** Associations of CXCL13 with immune infiltration degrees within various tumor.
